# Supplementary material for: Morphology-controlled mesoporous SiO2 nanorods for efficient scaffolds in organo-metal halide perovskite solar cells
Source: Royal Society of Chemistry journal article supplement (doi:10.1039/c6cc00522e), 2016-01-01
Supplement: c6cc00522e1.pdf [file c6cc00522e1.pdf]

Electronic Supplementary Information (ESI) for

**Morphology-controlled mesoporous SiO<sub>2</sub> nanorods for efficient scaffolds in organo-metal halide perovskite solar cells**

Kisu Lee,‡ Chang-Min Yoon,‡ Jungchul Noh and Jyongsik Jang\*

\* School of Chemical and Biological Engineering, College of Engineering, Seoul National University (SNU), 599 Gwanangno, Gwanak-gu, Seoul, 151-742 (Korea).

Fax: +82-2-888-1604; Tel: 82-2-880-7069; E-mail: [jsjang@plaza.snu.ac.kr](mailto:jsjang@plaza.snu.ac.kr)

‡ These authors contributed equally to this work.

## Experimental

**Materials:** Unless otherwise stated, all materials were purchased from Sigma-Aldrich and used as received. Methylamine (40% in methanol) was obtained from Junsei Chemical. Spiro-MeOTAD was purchased from Merck KGaA.

**Synthesis of mSiO<sub>2</sub> nanoparticles:** Three kinds of morphology-controlled mSiO<sub>2</sub> nanoparticles (spherical, short-rod, and long-rod) were synthesized using a sol-gel method.<sup>[1]</sup> The aspect ratios of the mSiO<sub>2</sub> materials were modified by controlling the amount of added water and fixing the supply of the other reagents. Spherical mSiO<sub>2</sub> particles were fabricated by mixing 27 mL of DI water, 5 mL of absolute ethyl alcohol, and 1.74 mL of ammonia solution. Then, 0.47 g of cetyltrimethylammonium bromide (CTAB) was added to the mixture and stirred for 15 min to allow micelle formation. Next, 1 mL of tetraethyl orthosilicate (TEOS) was added to the mixture and the mixture was allowed to react for 2 h. The resulting white cloudy solution was centrifuged several times with ethanol and water. The spherical mSiO<sub>2</sub> material was dried in an oven to remove residual moisture. To change the aspect ratio of mSiO<sub>2</sub> nanoparticles, different amounts of DI water were added in the first step: 120 mL for short rods and 60 mL for long rods.

**Fabrication of perovskite solar cells (PSCs):** The devices were fabricated on patterned, fluorine-doped tin oxide (FTO)-coated glass with a sheet resistance of 15  $\Omega$  sq<sup>-1</sup> (Pilkington). FTO substrates were cleaned sequentially in DI water, acetone, and 2-propanol for 60 min. A compact TiO<sub>2</sub> layer (40 nm) was deposited by spin-coating a colloidal solution of TiO<sub>2</sub> nanoparticles and titanium diisopropoxide bis(acetylacetonate) (TiAcAc), which was

synthesized following a previously reported method<sup>[2]</sup>, at 5,000 rpm and annealing at 150°C for 30 min in ambient air. Then, mSiO<sub>2</sub> nanoparticles dispersed in absolute ethanol (20 mg/mL) were spin-coated twice at 5,000 rpm and annealed at 150°C for 20 min. Methylammonium iodide (CH<sub>3</sub>NH<sub>3</sub>I) was prepared following a previous report.<sup>[3]</sup> A perovskite precursor solution (CH<sub>3</sub>NH<sub>3</sub>I:PbCl<sub>2</sub> = 3:1, 45 wt% in DMF) was prepared and stirred for 3 h at 70°C to obtain a homogeneous solution. The perovskite precursor solution was cast onto the substrate, spin-coated at 3500 rpm for 60 s under a N<sub>2</sub> atmosphere, and annealed at 100°C for 60 min in ambient air to form CH<sub>3</sub>NH<sub>3</sub>PbI<sub>3-x</sub>Cl<sub>x</sub> films (humidity < 30%). The hole-transporting layer was spin-coated from a 1-mL chlorobenzene solution including 72 mg of Spiro-MeOTAD, 28.8 μL of tert-butylpyridine, and 17.5 μL of acetonitrile solution containing 520 mg/mL lithium bis(trifluoromethylsulfonyl)imide salt at 4000 rpm for 30 s. Finally, a 70-nm-thick Au top electrode was deposited by thermal evaporation. The active area of the fabricated device was 0.09 cm<sup>2</sup>.

For fabricating MAPbI<sub>3</sub>-based PSCs, MAPbI<sub>3</sub> precursor solution was prepared by mixing 461 mg of PbI<sub>2</sub>, 159 mg of CH<sub>3</sub>NH<sub>3</sub>I, and 71 μL of DMSO (molar ratio 1:1:1) in 770 μL of DMF. The completely dissolved precursor solution was spin-coated on the mSiO<sub>2</sub> layer at 3000 rpm for 30 s, and 500 μL of diethyl ether was dripped onto the substrate at 10 s after starting rotation. The perovskite-precursor coated substrate was annealed on a hot plate at 100 °C for 10 m. The hole-transporting layer and Au top electrode were deposited in the same manner as described above.

**Measurement and Characterization:** Transmission electron microscopy (TEM) and field-emission scanning electron microscopy (FE-SEM) images were obtained with JEM 2100 and

JSM-6701F microscopes, respectively (JEOL, Japan). Atomic force microscope (AFM) images of spin-coated mSiO<sub>2</sub> nanoparticles were acquired with an Innova SPM (Veeco, USA) and analyzed using SPMLabAnalysis software. X-ray diffraction (XRD) of MAPbI<sub>3-x</sub>Cl<sub>x</sub> films was measured using Smartlab (Rigaku, Japan). UV-vis absorption and photoluminescence (PL) spectra of the MAPbI<sub>3-x</sub>Cl<sub>x</sub> films were measured with a Lambda 35 and LS 45 fluorescence spectrometer, respectively (Perkin-Elmer, USA). Time-resolved PL decay curves were recorded with a compact fluorescence lifetime spectrometer (Quantaaurus-Tau C11367-12, Hamamatsu). The films were photo-excited by a picosecond light pulser (PLP-10, Hamamatsu) in which the wavelength of the laser was 464 nm with a peak power of 231 mW and a pulse duration of 53 ps. The light was incident to the glass side of the sample with repetition rate of 5 MHz. The photocurrent-voltage (J-V) characteristics of the PSCs were examined using a 500-W xenon lamp and a MP-160 I-V Tracer (EKO Instruments, 5 ms delay time and 1.0 V/s scan rate). External quantum efficiency (EQE) was characterized from 350 nm to 850 nm using a K3100 IPCE Measurement System (McScience Inc., Korea; chopping frequency of 4 Hz, without bias light and 10-nm step wavelength). Electrochemical impedance spectra (EIS) of the PSCs were obtained by Zive Labs (Wonatech, Korea).

## Reference

- [1] H. Wang, P. V. d. Voort, H. Qu and S. Liu, *J. Nanopart. Res.*, 2013, **15**, 1-8.
- [2] K. Wojciechowski, M. Saliba, T. Leijtens, A. Abate and H. J. Snaith, *Energy Environ. Sci.*, 2014, **7**, 1142-1147.
- [3] J. Yun, J. Ryu, J. Lee, H. Yu and J. Jang, *J. Mater. Chem. A*, 2016, DOI: 10.1039/C5TA08250A.

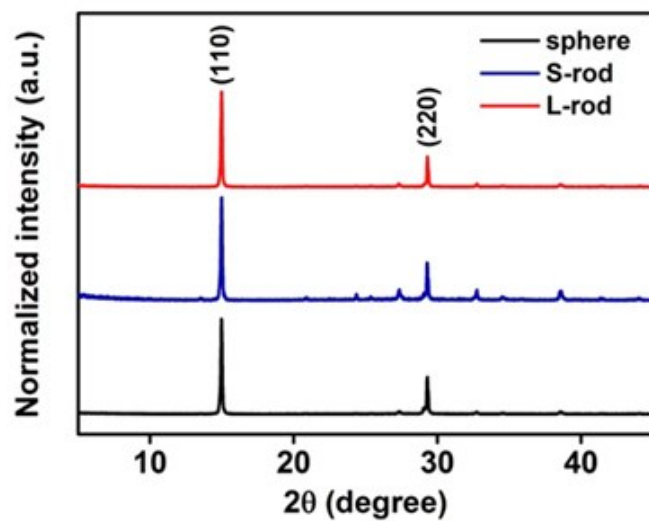

**Figure S1.** Normalized XRD diffractograms of MAPbI<sub>3-x</sub>Cl<sub>x</sub> films spin-coated on different mSiO<sub>2</sub> nanoparticles.

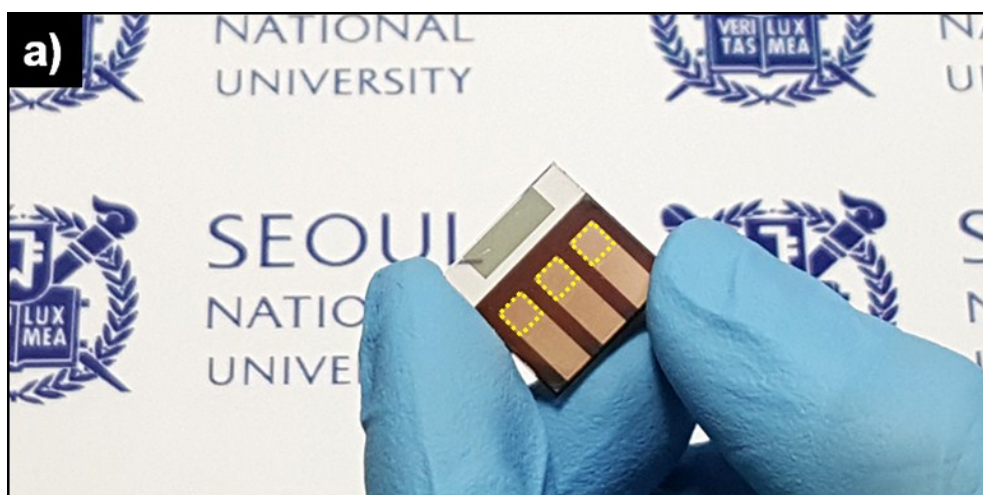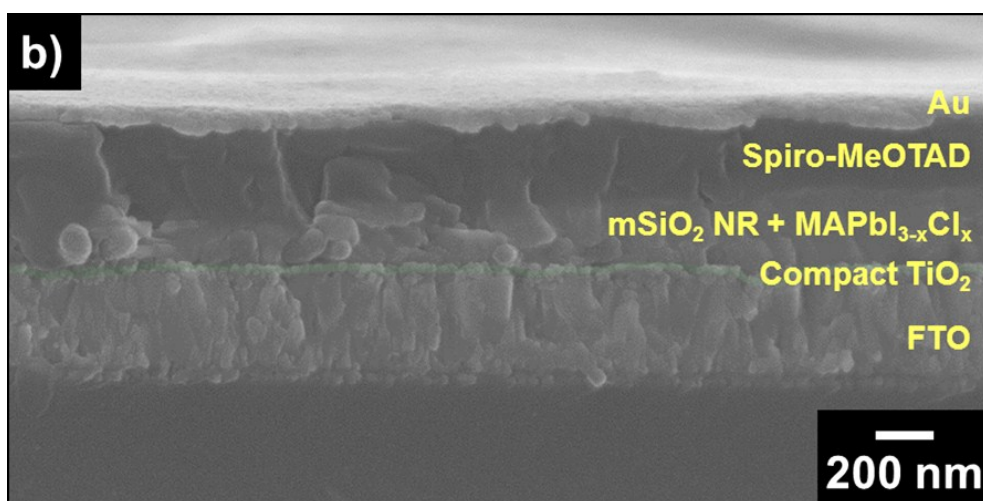

**Figure S2.** (a) A digital photograph of a perovskite solar cell (PSC) made with L-rod mSiO<sub>2</sub> scaffolds. The dashed yellow squares represent active areas of the cell (0.09 cm<sup>2</sup>). (b) A cross-sectional SEM micrograph of a PSC made with L-rod mSiO<sub>2</sub> scaffolds.

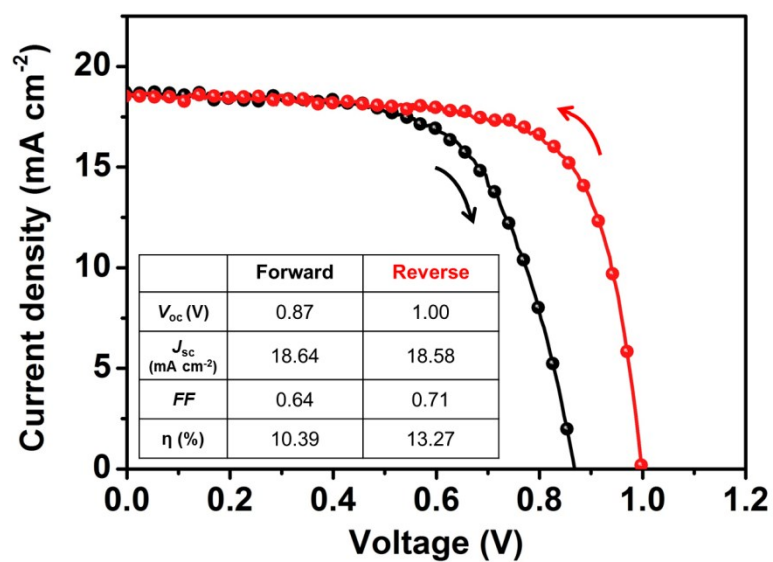

**Figure S3.** Hysteresis analysis of a perovskite solar cell made with L-rod  $\text{mSiO}_2$  scaffolds. Photovoltaic parameters are summarized in the inset table. The scan rate of forward and reverse scan mode was 0.35 V/s.

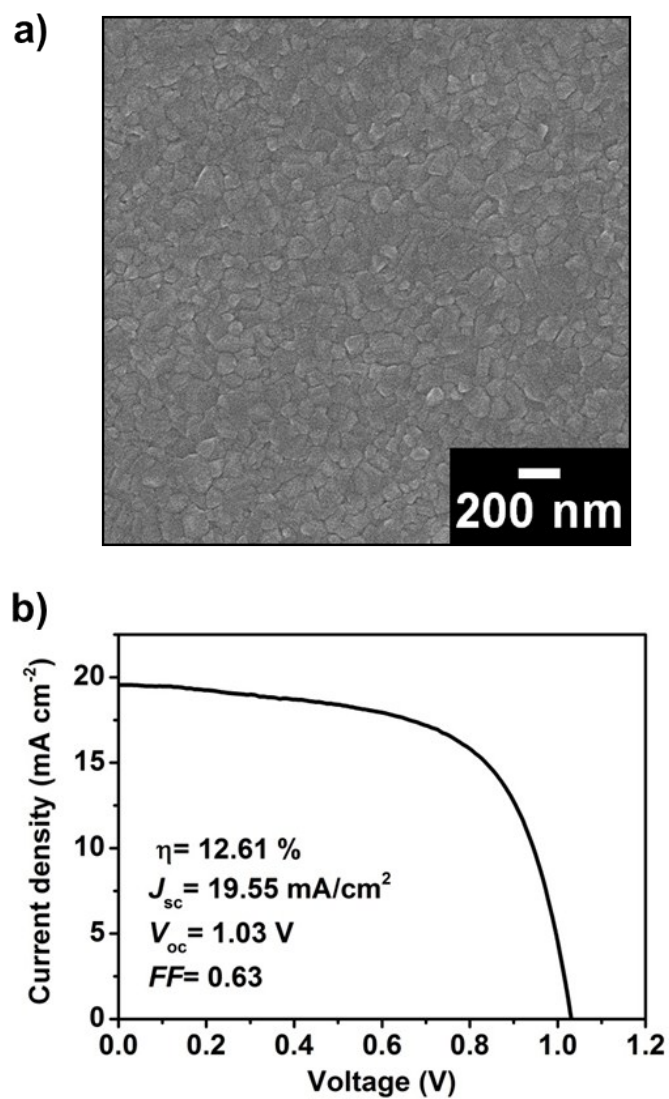

**Figure S4.** (a) A SEM micrograph of a spin-coated  $\text{MAPbI}_3$  film on L-rod  $\text{mSiO}_2$  nanoparticles. (b)  $J$ - $V$  curve and photovoltaic performance parameters for the best-performing  $\text{MAPbI}_3$  perovskite solar cell made with L-rod  $\text{mSiO}_2$  scaffolds.



**Table S1.** Photovoltaic parameters of the best performing PSCs using different mSiO<sub>2</sub> nanoparticles: sphere, S-rod, and L-rod.

| Sample | $V_{oc}$<br>(V) | $J_{sc}$<br>(mA cm <sup>-2</sup> ) | $FF$ | $\eta$ (%) |
|--------|-----------------|------------------------------------|------|------------|
| sphere | 1.06            | 17.22                              | 0.68 | 12.36      |
| S-rod  | 1.04            | 17.25                              | 0.68 | 12.57      |
| L-rod  | 1.02            | 19.42                              | 0.70 | 13.91      |
